# Supplementary material for: Quantifying the Impact and Extent of Undocumented Biomedical Synonymy
Source: PubMed Central journal article supplement (PMC4177665; doi:10.1371/journal.pcbi.1003799), 2014-09-25
Supplement: pcbi.1003799.s010.pdf [file pcbi.1003799.s010.pdf]

**Table S 2. The Sources for the Diseases and Syndromes Dataset**

| Thesaurus                                                                                                                   | Database Code | # of Concepts | # of Terms |
|-----------------------------------------------------------------------------------------------------------------------------|---------------|---------------|------------|
| SNOMED Clinical Terms                                                                                                       | SNOMEDCT      | 35,249        | 60,592     |
| Medical Subject Headings                                                                                                    | MSH           | 8,493         | 16,617     |
| COSTAR                                                                                                                      | COSTAR        | 1,501         | 1,629      |
| Online Mendelian Inheritance in Man                                                                                         | OMIM          | 8,061         | 18,167     |
| International Classification of Diseases, Ninth Revision, Clinical Modification                                             | ICD9CM        | 4,293         | 4,312      |
| Physician Data Query                                                                                                        | PDQ           | 1,439         | 3,705      |
| UMLS Metathesaurus                                                                                                          | MTH           | 1,931         | 1,949      |
| Consumer Health Vocabulary                                                                                                  | CHV           | 8,281         | 16,390     |
| COSTART                                                                                                                     | CST           | 1,378         | 1,870      |
| CRISP Thesaurus                                                                                                             | CSP           | 1,430         | 1,891      |
| DXplain                                                                                                                     | DXP           | 2,594         | 4,305      |
| NCI Thesaurus                                                                                                               | NCI           | 11,514        | 24,903     |
| National Drug File                                                                                                          | NDFRT         | 2,756         | 5,781      |
| International Classification of Diseases, Ninth Revision, Clinical Modification, Metathesaurus additional entry terms, 2012 | MTHICD9       | 5,694         | 7,146      |
| Total                                                                                                                       | NA            | 59,265        | 127,431    |

Summary statistics for the fourteen thesauri used to construct the Diseases and Syndromes terminology.
