# Supplementary material for: Quantifying the Impact and Extent of Undocumented Biomedical Synonymy
Source: PubMed Central journal article supplement (PMC4177665; doi:10.1371/journal.pcbi.1003799), 2014-09-25
Supplement: pcbi.1003799.s011.pdf [file pcbi.1003799.s011.pdf]

**Table S 2. The Sources for the Pharmacological Substances Dataset**

| Thesaurus                                   | Database Code | # of Concepts | # of Terms |
|---------------------------------------------|---------------|---------------|------------|
| SNOMED Clinical Terms                       | SNOMEDCT      | 7,014         | 10,487     |
| Medical Subject Headings                    | MSH           | 79,886        | 130,355    |
| Metathesaurus FDA Structured Product Labels | MTHSPL        | 3,183         | 3,294      |
| LOINC                                       | LNC           | 4,479         | 4,528      |
| Physician Data Query                        | PDQ           | 2,463         | 4,092      |
| UMLS Metathesaurus                          | MTH           | 1,791         | 1,793      |
| Consumer Health Vocabulary                  | CHV           | 7,738         | 10,190     |
| RxNorm Vocabulary                           | RXNORM        | 22,370        | 22,377     |
| CRISP Thesaurus                             | CSP           | 1,213         | 1,472      |
| NCI Thesaurus                               | NCI           | 15,696        | 29,945     |
| National Drug File                          | NDFRT         | 5,413         | 9,596      |
| Total                                       | NA            | 122,366       | 198,270    |

Summary statistics for the eleven thesauri used to construct the Pharmacological Substances terminology.
