# Supplementary material for: Quantifying the Impact and Extent of Undocumented Biomedical Synonymy
Source: PubMed Central journal article supplement (PMC4177665; doi:10.1371/journal.pcbi.1003799), 2014-09-25
Supplement: pcbi.1003799.s012.pdf [file pcbi.1003799.s012.pdf]

**Table S 4. The Sources for the General-English Dataset**

| Thesaurus                                                 | # of Headwords     | # of Synonymous Relationships |
|-----------------------------------------------------------|--------------------|-------------------------------|
| WordNet                                                   | $4.34 \times 10^4$ | $1.32 \times 10^5$            |
| Webster’s New World Roget’s A-Z Thesaurus                 | $2.41 \times 10^4$ | $2.49 \times 10^5$            |
| The Synonym Finder                                        | $1.86 \times 10^4$ | $6.02 \times 10^5$            |
| The Oxford Thesaurus                                      | $1.56 \times 10^4$ | $2.34 \times 10^5$            |
| The Oxford Dictionary of Synonyms and Antonyms            | $0.81 \times 10^4$ | $0.87 \times 10^5$            |
| 21st Century Synonym and Antonym Finder                   | $0.70 \times 10^4$ | $1.29 \times 10^5$            |
| A Dictionary of Synonyms and Antonyms                     | $0.37 \times 10^4$ | $0.54 \times 10^5$            |
| Merriam Webster Thesaurus                                 | $0.37 \times 10^4$ | $0.91 \times 10^5$            |
| Scholastic Dictionary of Synonyms, Antonyms, and Homonyms | $0.21 \times 10^4$ | $0.19 \times 10^5$            |
| Full Dataset                                              | $5.33 \times 10^4$ | $1.04 \times 10^6$            |

Summary statistics for nine thesauri used to construct the general-English near-synonym terminology.
