# Supplementary material for: Quantifying the Impact and Extent of Undocumented Biomedical Synonymy
Source: PubMed Central journal article supplement (PMC4177665; doi:10.1371/journal.pcbi.1003799), 2014-09-25
Supplement: pcbi.1003799.s013.pdf [file pcbi.1003799.s013.pdf]

**Table S 5. Estimates for the Extent of Undocumented Synonymy for the Three Terminologies Included in this Study**

| Domain                     | $(H, S)$ | Log Evid.          | Frac. Heads/Concepts Missing | Frac. Synonyms Missing   |
|----------------------------|----------|--------------------|------------------------------|--------------------------|
| Diseases and Syndromes     | (10, 4)  | $-3.8 \times 10^5$ | 60.61%<br>(60.28, 60.93)     | 92.26%<br>(92.17, 92.33) |
| Pharmacological Substances | (10, 4)  | $-4.2 \times 10^5$ | 95.02%<br>(94.98, 95.05)     | 99.03%<br>(99.02, 99.04) |
| General-English            | (10, 4)  | $-2.6 \times 10^6$ | 29.73%<br>(29.30, 30.15)     | 93.20%<br>(93.16, 93.23) |

This table provides the lower bound on the log-evidence for the best fitting annotation mixture models specific to each lexical domain. Moreover, it provides the fraction of headwords/concepts and synonym pairs/terms predicted to be undocumented within each dataset. Values in parenthesis indicate the 99% credible intervals for the estimates.
