# Supplementary material for: Quantifying the Impact and Extent of Undocumented Biomedical Synonymy
Source: PLOS journal article supplement (doi:10.1371/journal.pcbi.1003799), 2014-09-25
Supplement: S9 (10.1371/journal.pcbi.1003799.s009) [file journal.pcbi.1003799.s009]

| Mention in Text (Missing Synonym)            | Correct Concept                               | Corpus of Origin |
|----------------------------------------------|-----------------------------------------------|------------------|
| attenuated fap                               | attenuated adenomatous polyposis coli         | AZDC             |
| c2 deficient                                 | complement 2 deficiency                       | AZDC             |
| inherited breast ovarian cancer              | hereditary breast and ovarian cancer syndrome | AZDC             |
| multi system disorder                        | multisystem disorder                          | AZDC             |
| cgkd                                         | deficiency of glycerol kinase                 | AZDC             |
| colorectal tumorigenesis                     | colorectal neoplasm                           | AZDC             |
| coats telangiectasis                         | exudative retinopathy                         | AZDC             |
| searching gaze                               | congenital nystagmus                          | AZDC             |
| congenital forms of dm                       | congenital myotonic dystrophy                 | AZDC             |
| neonatal ald                                 | neonatal adrenoleukodystrophy                 | NCBI             |
| breast ovary cancer family syndrome          | hereditary breast and ovarian cancer syndrome | NCBI             |
| pts1 protein import defect                   | zellweger syndrome                            | NCBI             |
| searching gaze                               | congenital nystagmus                          | NCBI             |
| attenuated fap                               | attenuated adenomatous polyposis coli         | NCBI             |
| wilms tumorigenesis                          | nephroblastoma                                | NCBI             |
| frataxin deficiency                          | friedreich ataxia                             | NCBI             |
| chronic neisserial infection                 | neisseriaceae infections                      | NCBI             |
| l n syndrome                                 | lesch nyhan syndrome                          | NCBI             |
| x linked recessive thrombocytopenic disorder | x linked thrombocytopenia                     | NCBI             |
| dmpk deficient                               | dystrophia myotonica 1                        | NCBI             |
| palmoplantar hyperkeratosis                  | palmoplantar keratosis                        | NCBI             |
| oedemic buccal mucosa                        | oral leukoedema                               | NCBI             |

Examples of disease name mentions that were not correctly normalized by the four algorithms considered in this study as a result of undocumented synonymy. Note, some of these errors are replicated in both corpora, indicating that they are not isolated annotations.
